# Supplementary material for: A Systematic Study of Gene Mutations in Urothelial Carcinoma; Inactivating Mutations in TSC2 and PIK3R1
Source: PLoS One. 2011 Apr 14;6(4):e18583. doi: 10.1371/journal.pone.0018583 (PMC3077383; doi:10.1371/journal.pone.0018583)
Supplement: Table S1 — Clinical features and mutation data. (XLS) [file pone.0018583.s002.xls]

## Sheet: Sheet1
Table S1. Clinical features and mutation data for each case.
Sample ID	Gender	Stage	Grade	Primary	Seriesa	FGFR3b	PIK3CAc	TP53	PIK3R1d	RAS	AKT1	TSC1	TSC2	CTNNB1	APC
UC_0001_1	Male	T3b	G3	TRUE	145	1	2	1	0	0	0	0	0	0	0
UC_0002_1	Male	T2	G2	TRUE	145	1	0	0	0	0	0	0	0	0	1
UC_0003_1	Male	T1	G2	FALSE	145	0	0	1	0	0	0	0	1	0	0
UC_0005_1	Female	Ta	G1	FALSE	145	1	0	1	0	0	0	1	0	0	0
UC_0006_2	Male	T1	G2	FALSE	145	1	0	0	0	0	0	0	1	0	0
UC_0007_1	Male	T3b	G3	TRUE	145	0	0	0	0	0	0	0	0	0	0
UC_0008_1	Male	T1	G2	TRUE	145	0	1	1	0	0	0	0	0	0	0
UC_0009_2	Male	Ta	G1	FALSE	145	1	0	0	0	0	0	0	1	0	0
UC_0010_1	Male	T1	G2	FALSE	145	0	0	0	0	0	0	0	1	0	0
UC_0011_3	Female	Ta	G2	FALSE	145	1	0	0	0	0	0	0	0	0	0
UC_0012_1	Male	Ta	G1	TRUE	145	1	0	0	0	0	0	0	0	0	0
UC_0015_1	Male	Ta	G1	FALSE	145	0	0	0	0	0	0	0	0	0	1
UC_0016_1	Female	T3b	G3	TRUE	145	0	0	1	0	0	0	0	0	0	0
UC_0017_1	Male	Ta	G2	TRUE	145	0	0	0	0	1	0	0	0	0	0
UC_0021_1	Male	Ta	G1	TRUE	145	1	0	0	0	0	0	0	0	0	0
UC_0022_1	Male	T4b	G3	TRUE	145	1	0	1	0	0	0	0	0	0	0
UC_0023_1	Male	T3b	G3	TRUE	145	0	0	0	0	0	0	0	0	0	1
UC_0024_1	Male	Ta	G2	FALSE	Ext	0	0	0	#N/A	0	#N/A	#N/A	#N/A	#N/A	#N/A
UC_0025_1	Male	Ta	G2	TRUE	145	0	0	0	0	0	0	0	0	0	0
UC_0026_1	Male	Ta	G2	FALSE	145	1	0	0	0	0	0	0	0	0	0
UC_0029_1	Male	Ta	G2	TRUE	145	0	0	1	0	0	0	0	0	0	0
UC_0033_2	Male	Ta	G2	FALSE	Ext	0	0	0	#N/A	0	#N/A	#N/A	#N/A	#N/A	#N/A
UC_0034_1	Female	T3b	G3	TRUE	145	0	0	1	0	0	0	0	0	0	0
UC_0037_1	Female	T1	G2	TRUE	145	1	0	0	0	0	1	1	0	0	0
UC_0039_1	Male	T2	G3	TRUE	145	0	1	0	0	0	0	0	0	0	0
UC_0040_1	Female	T1	G3	TRUE	145	1	2	0	0	0	0	0	0	0	0
UC_0041_2	Female	Ta	G1	FALSE	Ext	1	1	0	#N/A	0	#N/A	#N/A	#N/A	#N/A	#N/A
UC_0042_1	Male	Ta	G2	FALSE	145	1	0	1	0	0	0	0	0	0	0
UC_0043_1	Male	T1	G2	TRUE	145	1	0	1	0	0	0	0	0	0	0
UC_0045_4	Male	T2b	G3	FALSE	Ext	0	0	0	#N/A	0	#N/A	#N/A	#N/A	#N/A	#N/A
UC_0046_1	Male	T4a	G3	TRUE	145	1	0	0	0	0	0	0	0	0	0
UC_0047_1	Male	Ta	G1	TRUE	145	1	0	0	0	0	0	0	0	0	0
UC_0049_2	Male	T1	G3	FALSE	145	0	0	1	0	0	0	0	0	0	0
UC_0051_1	Male	Ta	G2	TRUE	145	1	0	0	0	0	0	0	0	0	0
UC_0052_1	Male	Ta	G1	TRUE	145	1	0	0	0	0	0	0	0	0	0
UC_0053_1	Male	T1	G3	TRUE	145	0	0	1	0	0	0	0	0	0	0
UC_0055_1	Female	T2	G3	TRUE	Ext	0	0	0	#N/A	0	#N/A	#N/A	#N/A	#N/A	#N/A
UC_0056_1	Male	Ta	G1	TRUE	145	1	0	0	0	0	0	0	0	0	0
UC_0057_1	Male	Ta	G3	TRUE	145	0	0	1	0	0	0	0	0	0	0
UC_0059_1	Male	T2	G3	TRUE	145	0	0	1	0	0	0	0	0	0	0
UC_0060_1	Male	Ta	G2	TRUE	145	0	0	1	0	0	0	0	0	1	0
UC_0061_1	Male	Ta	G2	TRUE	145	1	0	0	0	0	0	0	0	0	0
UC_0064_1	Male	Ta	G2	TRUE	145	0	0	0	0	0	0	0	0	0	0
UC_0066_1	Male	Ta	G2	TRUE	145	0	0	0	0	0	0	0	0	0	0
UC_0067_1	Male	T1	G2	TRUE	145	1	1	0	0	0	0	0	0	0	0
UC_0069_1	Female	T3a	G3	TRUE	145	0	0	1	0	0	0	0	0	0	0
UC_0070_1	Male	Ta	G2	TRUE	145	1	0	0	0	0	0	0	0	0	0
UC_0073_1	Male	Ta	G3	TRUE	145	0	0	0	0	0	0	0	0	0	0
UC_0075_1	Male	Ta	G1	TRUE	145	0	0	0	0	0	0	0	0	0	0
UC_0076_1	Female	Ta	G2	TRUE	145	1	0	0	0	0	0	0	0	0	0
UC_0077_1	Male	T1	G3	TRUE	145	0	0	1	0	0	0	0	0	0	0
UC_0078_1	Male	Ta	G1	TRUE	145	1	1	0	0	0	0	0	0	0	0
UC_0080_1	Male	T1	G2	TRUE	Ext	1	0	1	#N/A	0	#N/A	#N/A	#N/A	#N/A	#N/A
UC_0086_1	Male	T2b	G3	TRUE	145	0	0	1	0	0	0	0	0	0	0
UC_0093_1	Male	T3b	G3	TRUE	145	0	0	1	0	0	0	1	0	0	1
UC_0095_1	Male	T3b	G3	TRUE	145	0	0	0	0	0	0	0	0	0	0
UC_0096_1	Male	Ta	G2	TRUE	145	1	0	0	0	0	0	1	0	0	0
UC_0097_1	Male	Ta	G3	TRUE	145	0	1	0	0	0	0	0	0	0	0
UC_0100_1	Female	Ta	G1	TRUE	Ext	1	0	0	#N/A	0	#N/A	#N/A	#N/A	#N/A	#N/A
UC_0102_2	Female	T2	G3	FALSE	145	0	0	0	0	0	0	0	0	0	0
UC_0103_1	Female	T2	G3	TRUE	Ext	0	0	0	#N/A	0	#N/A	#N/A	#N/A	#N/A	#N/A
UC_0106_1	Female	Ta	G1	TRUE	145	1	2	0	0	0	0	0	0	0	0
UC_0108_1	Male	T3b	G3	TRUE	145	0	0	0	0	0	0	0	0	0	0
UC_0109_1	Male	T2a	G3	TRUE	145	0	0	1	0	0	0	0	0	0	0
UC_0110_1	Male	Ta	G2	TRUE	145	0	0	0	0	0	0	0	0	0	0
UC_0111_1	Female	T1	G2	TRUE	145	1	0	0	0	0	0	0	0	0	0
UC_0112_1	Female	Ta	G2	TRUE	145	0	0	0	0	0	0	0	0	0	0
UC_0114_1	Female	Ta	G2	TRUE	145	1	1	0	0	0	0	0	0	0	0
UC_0115_1	Male	T1	G2	TRUE	145	1	0	0	0	1	0	0	0	0	0
UC_0117_1	Female	T2	G3	TRUE	145	1	0	0	0	0	0	1	0	0	0
UC_0120_1	Male	T1	G3	TRUE	145	0	0	1	0	0	0	1	0	0	0
UC_0122_1	Male	T1	G3	TRUE	145	0	0	0	0	0	0	0	0	0	0
UC_0129_1	Male	Ta	G1	TRUE	145	1	0	1	0	0	0	0	0	0	0
UC_0130_1	Female	Ta	G1	TRUE	145	1	0	0	0	0	0	0	0	0	0
UC_0132_1	Male	T1	G3	TRUE	145	0	0	0	0	0	0	0	0	0	0
UC_0134_1	Male	T2	G3	TRUE	145	0	0	0	0	0	0	0	0	0	1
UC_0135_1	Male	Ta	G2	TRUE	145	0	0	1	0	0	0	0	0	0	0
UC_0137_1	Male	Ta	G1	FALSE	145	1	0	0	0	0	0	0	0	0	0
UC_0138_1	Male	T2b	G3	TRUE	145	0	0	1	0	0	0	0	0	0	0
UC_0139_2	Male	T2	G3	FALSE	145	0	0	0	0	0	0	0	0	0	0
UC_0140_1	Male	Ta	G1	TRUE	145	0	1	0	0	0	0	1	0	0	0
UC_0145_1	Male	Ta	G2	TRUE	145	1	2	0	0	0	0	0	0	0	0
UC_0147_1	Female	Ta	G1	TRUE	145	1	0	0	0	0	0	0	0	0	0
UC_0149_1	Male	Ta	G1	TRUE	145	0	0	0	0	0	0	0	0	0	0
UC_0151_1	Male	T2	G3	TRUE	Ext	0	0	0	#N/A	0	#N/A	#N/A	#N/A	#N/A	#N/A
UC_0152_1	Male	T1	G3	FALSE	145	0	0	1	0	0	0	0	0	0	0
UC_0154_2	Male	T2	G3	FALSE	145	0	0	1	0	0	0	0	0	0	0
UC_0159_1	Female	T1	G2	TRUE	145	1	0	0	0	0	0	0	0	0	0
UC_0161_1	Male	Ta	G1	TRUE	145	1	1	0	0	0	0	0	0	0	0
UC_0162_1	Male	Ta	G1	TRUE	145	1	0	0	0	0	0	0	0	0	0
UC_0165_1	Male	Ta	G2	FALSE	145	1	0	0	0	0	0	0	0	0	0
UC_0166_1	Male	T2	G3	TRUE	145	1	0	1	0	0	0	0	0	0	0
UC_0168_1	Male	Ta	G1	TRUE	145	1	0	0	0	0	0	0	0	0	0
UC_0169_1	Male	T3a	G3	TRUE	145	0	0	0	0	0	0	0	0	0	0
UC_0170_1	Male	T1	G3	TRUE	145	0	0	0	0	0	0	1	0	0	0
UC_0172_1	Male	Ta	G2	TRUE	145	1	0	0	0	0	0	0	0	0	0
UC_0173_1	Female	Ta	G1	TRUE	145	1	2	0	0	0	0	1	0	0	0
UC_0176_2	Male	Ta	G2	FALSE	Ext	1	0	0	#N/A	0	#N/A	#N/A	#N/A	#N/A	#N/A
UC_0180_1	Female	T3b	G3	TRUE	145	0	0	0	0	0	0	0	0	0	0
UC_0184_1	Female	Ta	G3	TRUE	145	1	0	0	0	0	0	0	0	0	0
UC_0185_1	Female	T1	G2	TRUE	145	0	1	0	0	1	0	0	0	0	0
UC_0187_1	Male	T3a	G3	TRUE	145	0	0	1	0	0	0	0	0	0	0
UC_0192_1	Male	Ta	G2	TRUE	145	0	1	0	0	1	0	1	0	0	0
UC_0193_1	Male	T2	G3	TRUE	145	1	0	1	0	0	0	0	0	0	0
UC_0195_1	Female	T2	G3	TRUE	145	0	0	0	0	0	1	0	1	0	0
UC_0196_1	Male	T2	G3	TRUE	145	0	0	0	0	0	0	0	0	0	0
UC_0199_3	Male	T2	G3	FALSE	145	0	1	1	0	0	0	0	0	0	0
UC_0200_1	Male	T1	G2	TRUE	145	0	0	0	0	1	0	0	0	0	0
UC_0201_1	Male	T2	G3	TRUE	Ext	1	0	0	#N/A	0	#N/A	#N/A	#N/A	#N/A	#N/A
UC_0203_1	Male	T1	G3	TRUE	145	0	0	1	0	0	0	1	0	0	0
UC_0207_1	Male	T3b	G3	TRUE	145	0	0	1	0	0	0	0	0	0	1
UC_0208_1	Female	Ta	G1	TRUE	Ext	1	0	0	#N/A	0	#N/A	#N/A	#N/A	#N/A	#N/A
UC_0209_1	Male	Ta	G1	TRUE	Ext	0	1	0	#N/A	0	#N/A	#N/A	#N/A	#N/A	#N/A
UC_0210_2	Male	Ta	G1	FALSE	Ext	0	0	0	#N/A	0	#N/A	#N/A	#N/A	#N/A	#N/A
UC_0211_1	Male	T1	G2	TRUE	Ext	0	0	0	#N/A	0	#N/A	#N/A	#N/A	#N/A	#N/A
UC_0213_1	Male	T1	G2	TRUE	Ext	0	0	0	#N/A	0	#N/A	#N/A	#N/A	#N/A	#N/A
UC_0214_1	Male	T3b	G3	TRUE	145	0	1	1	0	0	0	1	0	0	0
UC_0215_1	Male	T1	G3	TRUE	145	1	1	1	0	0	0	1	0	0	0
UC_0218_2	Male	Ta	G2	FALSE	Ext	0	0	1	#N/A	0	#N/A	#N/A	#N/A	#N/A	#N/A
UC_0219_1	Female	T3b	G3	TRUE	145	0	0	0	0	0	0	0	0	0	0
UC_0223_1	Male	T1	G3	TRUE	145	0	0	0	0	1	0	0	0	0	0
UC_0224_1	Male	T3b	G3	TRUE	145	0	0	1	0	0	0	0	0	0	0
UC_0226_1	Male	T1	G2	TRUE	145	0	0	0	0	0	0	0	0	1	0
UC_0230_1	Male	T1	G3	TRUE	145	1	0	1	0	0	0	0	0	0	0
UC_0231_1	Male	T2	G3	TRUE	145	0	0	0	0	0	0	1	0	0	0
UC_0234_1	Male	T2	G3	TRUE	Ext	0	0	0	#N/A	0	#N/A	#N/A	#N/A	#N/A	#N/A
UC_0235_1	Female	Ta	G3	TRUE	145	1	0	0	0	0	0	0	0	0	0
UC_0238_1	Male	Ta	G3	TRUE	Ext	0	0	0	#N/A	0	#N/A	#N/A	#N/A	#N/A	#N/A
UC_0240_1	Male	Ta	G1	FALSE	Ext	1	1	0	#N/A	0	#N/A	#N/A	#N/A	#N/A	#N/A
UC_0241_1	Male	T3b	G2	TRUE	145	1	0	0	0	0	0	0	0	0	0
UC_0242_1	Female	T4a	G3	TRUE	145	0	0	1	0	1	0	0	0	0	0
UC_0247_1	Male	T2	G2	TRUE	Ext	0	0	1	#N/A	0	#N/A	#N/A	#N/A	#N/A	#N/A
UC_0248_1	Male	T0	G0	FALSE	Ext	0	0	0	#N/A	0	#N/A	#N/A	#N/A	#N/A	#N/A
UC_0249_1	Male	Tx	G3	TRUE	145	1	2	0	0	0	0	0	0	0	0
UC_0250_1	Male	T3b	G3	TRUE	145	0	0	0	0	0	0	0	0	0	0
UC_0257_1	Male	Ta	G2	TRUE	Ext	0	1	0	#N/A	1	#N/A	#N/A	#N/A	#N/A	#N/A
UC_0263_1	Male	T3a	G3	TRUE	145	1	0	0	0	0	0	0	0	0	0
UC_0265_1	Male	T2	G3	TRUE	145	1	0	1	0	0	0	0	0	0	0
UC_0267_3	Male	T1	G3	FALSE	145	0	0	0	0	0	0	0	0	0	0
UC_0274_1	Female	Ta	G1	TRUE	Ext	1	0	0	#N/A	0	#N/A	#N/A	#N/A	#N/A	#N/A
UC_0277_1	Male	T2	G3	TRUE	Ext	0	1	0	#N/A	0	#N/A	#N/A	#N/A	#N/A	#N/A
UC_0279_1	Male	Ta	G2	TRUE	Ext	1	0	0	#N/A	0	#N/A	#N/A	#N/A	#N/A	#N/A
UC_0283_1	Male	T1	G3	TRUE	145	0	0	0	0	0	0	0	0	0	0
UC_0284_1	Male	Ta	G2	TRUE	Ext	1	1	0	#N/A	0	#N/A	#N/A	#N/A	#N/A	#N/A
UC_0287_1	Male	T1	G3	TRUE	Ext	0	0	1	#N/A	0	#N/A	#N/A	#N/A	#N/A	#N/A
UC_0288_1	Male	Ta	G2	TRUE	145	1	0	0	0	0	0	1	0	0	0
UC_0290_1	Male	T1	G2	TRUE	145	0	1	1	1	0	0	0	0	0	0
UC_0295_1	Male	Ta	G2	FALSE	Ext	0	0	0	#N/A	0	#N/A	#N/A	#N/A	#N/A	#N/A
UC_0299_1	Male	T1	G3	TRUE	Ext	0	0	0	#N/A	0	#N/A	#N/A	#N/A	#N/A	#N/A
UC_0301_1	Male	T1	G3	TRUE	145	1	0	1	0	0	0	1	0	1	0
UC_0302_1	Male	T1	G3	TRUE	145	0	0	1	0	0	0	0	0	0	0
UC_0312_1	Female	T1	G2	TRUE	145	1	0	1	0	0	0	0	0	0	0
UC_0321_1	Female	T2a	G2	TRUE	145	1	0	1	0	0	0	1	0	0	0
UC_0322_2	Male	T2	G3	FALSE	145	0	0	1	0	0	0	0	0	0	0
UC_0323_1	Male	T2	G3	TRUE	145	1	2	0	0	0	0	0	0	0	0
UC_0327_1	Female	Ta	G1	TRUE	Ext	1	2	0	#N/A	0	#N/A	#N/A	#N/A	#N/A	#N/A
UC_0328_1	Female	Ta	G2	TRUE	Ext	0	0	0	#N/A	0	#N/A	#N/A	#N/A	#N/A	#N/A
UC_0329_1	Female	T3b	G3	TRUE	145	0	0	1	0	0	0	0	0	0	0
UC_0333_1	Male	T1	G3	TRUE	Ext	0	0	0	#N/A	0	#N/A	#N/A	#N/A	#N/A	#N/A
UC_0335_1	Male	T3b	G3	TRUE	145	0	0	1	0	0	0	0	0	0	0
UC_0336_1	Male	Ta	G2	TRUE	Ext	0	0	0	#N/A	0	#N/A	#N/A	#N/A	#N/A	#N/A
UC_0337_1	Male	T1	G3	TRUE	Ext	0	0	0	#N/A	0	#N/A	#N/A	#N/A	#N/A	#N/A
UC_0338_1	Male	T2a	G3	TRUE	145	0	0	0	0	0	0	0	0	0	0
UC_0339_1	Male	T3b	G3	TRUE	145	0	0	1	0	0	0	0	0	0	0
UC_0340_1	Female	T1	G2	TRUE	Ext	0	0	0	#N/A	0	#N/A	#N/A	#N/A	#N/A	#N/A
UC_0342_1	Male	T1	G3	TRUE	Ext	0	0	1	#N/A	0	#N/A	#N/A	#N/A	#N/A	#N/A
UC_0343_1	Female	Ta	G2	TRUE	Ext	1	0	0	#N/A	0	#N/A	#N/A	#N/A	#N/A	#N/A
UC_0344_1	Male	T1	G2	TRUE	Ext	1	0	1	#N/A	0	#N/A	#N/A	#N/A	#N/A	#N/A
UC_0345_1	Male	T2	G3	TRUE	Ext	0	0	1	#N/A	0	#N/A	#N/A	#N/A	#N/A	#N/A
UC_0348_1	Male	T2	G3	TRUE	Ext	0	0	0	#N/A	0	#N/A	#N/A	#N/A	#N/A	#N/A
UC_0349_2	Female	T1	G3	FALSE	145	1	0	0	0	0	0	0	0	0	0
UC_0354_2a	Male	Ta	G1	FALSE	145	0	1	0	0	0	0	0	0	0	0
UC_0359_1	Male	Ta	LMP	TRUE	Ext	1	0	0	#N/A	0	#N/A	#N/A	#N/A	#N/A	#N/A
UC_0361_1	Male	Ta	G1	TRUE	Ext	1	0	0	#N/A	0	#N/A	#N/A	#N/A	#N/A	#N/A
UC_0367_1	Male	Ta	G2	TRUE	Ext	1	1	0	#N/A	0	#N/A	#N/A	#N/A	#N/A	#N/A
UC_0368_1	Male	Ta	G2	TRUE	Ext	1	0	1	#N/A	0	#N/A	#N/A	#N/A	#N/A	#N/A
UC_0372_1	Male	T3b	G3	TRUE	145	0	0	0	0	0	0	0	0	0	0
UC_0374_2a	Female	Ta	G1	FALSE	Ext	1	2	0	#N/A	0	#N/A	#N/A	#N/A	#N/A	#N/A
UC_0376_1	Male	T1	G3	TRUE	145	0	0	1	0	0	0	0	0	0	0
UC_0378_1	Male	T3a	G3	TRUE	Ext	0	0	0	#N/A	0	#N/A	#N/A	#N/A	#N/A	#N/A
UC_0381_1	Male	T2b	G3	TRUE	145	0	0	0	0	0	0	0	0	0	0
UC_0384_1	Male	T1	G3	TRUE	Ext	0	0	1	#N/A	0	#N/A	#N/A	#N/A	#N/A	#N/A
UC_0386_1	Female	Ta	G2	TRUE	Ext	1	1	0	#N/A	0	#N/A	#N/A	#N/A	#N/A	#N/A
UC_0394_1	Male	T3b	G3	TRUE	145	0	0	0	0	0	0	0	0	0	0
UC_0395_1a	Female	Ta	G1	TRUE	145	0	0	0	0	0	0	0	0	0	0
UC_0397_1	Male	T3b	G3	TRUE	Ext	0	0	0	#N/A	0	#N/A	#N/A	#N/A	#N/A	#N/A
UC_0399_1	Female	T1	G3	TRUE	145	0	0	1	0	0	0	0	0	0	0
UC_0400_1a	Male	T4b	G3	TRUE	145	0	0	0	0	0	0	0	0	0	0
UC_0410_1b	Male	T2	G3	TRUE	145	0	0	1	0	0	0	0	0	0	0
UC_0455_1	Male	T3b	G3	TRUE	145	0	0	0	0	0	0	0	0	0	0
UC_0456_1	Male	Ta	G2	TRUE	145	0	0	0	0	0	0	0	0	0	0
UC_0458_1	Male	T2	G3	TRUE	145	0	0	1	0	0	0	0	0	0	0
UC_0475_1	Male	T3b	Gx	TRUE	Ext	0	1	0	#N/A	0	#N/A	#N/A	#N/A	#N/A	#N/A
UC_0488_2	Male	T1	G3	FALSE	Ext	0	0	1	#N/A	1	#N/A	#N/A	#N/A	#N/A	#N/A
UC_0507_1	Male	T1	G3	TRUE	Ext	0	0	0	#N/A	0	#N/A	#N/A	#N/A	#N/A	#N/A
UC_0513_1a	Female	T1	G3	TRUE	145	1	0	0	0	0	0	0	0	0	0
UC_0516_1	Male	T2	G3	TRUE	Ext	0	0	1	#N/A	1	#N/A	#N/A	#N/A	#N/A	#N/A
UC_0518_1	Male	T1	G3	TRUE	Ext	0	0	1	#N/A	0	#N/A	#N/A	#N/A	#N/A	#N/A
UC_0519_1	Male	T2a	G3	TRUE	Ext	1	2	0	#N/A	0	#N/A	#N/A	#N/A	#N/A	#N/A
UC_0521_1	Male	T2	G3	TRUE	Ext	0	0	0	#N/A	0	#N/A	#N/A	#N/A	#N/A	#N/A
UC_0522_1	Male	T1	G3	TRUE	Ext	0	0	1	#N/A	0	#N/A	#N/A	#N/A	#N/A	#N/A
UC_0527_1	Male	T3b	Gx	TRUE	Ext	0	0	0	#N/A	0	#N/A	#N/A	#N/A	#N/A	#N/A
UC_0528_1	Male	T2	G3	TRUE	Ext	0	0	0	#N/A	0	#N/A	#N/A	#N/A	#N/A	#N/A
UC_0533_1	Female	T2	G3	TRUE	Ext	0	0	1	#N/A	0	#N/A	#N/A	#N/A	#N/A	#N/A
UC_0535_1	Female	T2	G3	TRUE	Ext	0	0	0	#N/A	0	#N/A	#N/A	#N/A	#N/A	#N/A
UC_0538_1	Male	T2	G3	TRUE	Ext	0	0	0	#N/A	0	#N/A	#N/A	#N/A	#N/A	#N/A
UC_0539_1	Female	T2	G3	TRUE	Ext	0	0	1	#N/A	0	#N/A	#N/A	#N/A	#N/A	#N/A
UC_0542_1	Female	Ta	G2	TRUE	145	1	1	0	0	0	0	0	0	0	0
UC_0543_1	Male	T2	G3	TRUE	Ext	0	0	1	#N/A	0	#N/A	#N/A	#N/A	#N/A	#N/A
UC_0544_1	Male	Ta	G2	TRUE	145	1	1	1	0	0	0	0	0	0	0
UC_0545_1	Male	T2	G3	TRUE	Ext	1	1	1	#N/A	0	#N/A	#N/A	#N/A	#N/A	#N/A
UC_0551_1	Male	T1	G3	TRUE	Ext	0	0	1	#N/A	0	#N/A	#N/A	#N/A	#N/A	#N/A
UC_0552_1	Male	T1	G3	TRUE	Ext	0	0	0	#N/A	0	#N/A	#N/A	#N/A	#N/A	#N/A
UC_0566_1	Female	T2	G3	TRUE	Ext	0	0	1	#N/A	0	#N/A	#N/A	#N/A	#N/A	#N/A
UC_0567_1	Female	T2	G3	TRUE	Ext	0	0	1	#N/A	0	#N/A	#N/A	#N/A	#N/A	#N/A
UC_0589_1	Male	T1	G3	TRUE	Ext	0	0	1	#N/A	0	#N/A	#N/A	#N/A	#N/A	#N/A
UC_0595_1	Male	T2a	G3	TRUE	Ext	0	0	0	#N/A	0	#N/A	#N/A	#N/A	#N/A	#N/A
UC_0610_1	Male	T2	G2	TRUE	Ext	0	0	0	#N/A	0	#N/A	#N/A	#N/A	#N/A	#N/A
a 145 indicates the original series tested for mutations in all genes; Ext indicates the additional 73 cases tested for mutations in FGFR3, PIK3CA, TP53, HRAS, KRAS, and NRAS.
b Presence of mutation is indicated by a "1"; absence of mutation is indicated by "0".
c For PIK3CA mutations in the helix domain are indicated by a "1"; and mutations in the kinase domain are indicated by a "2"
d #N/A indicates that no mutation analysis was performed.
