# Supplementary material for: A Systematic Study of Gene Mutations in Urothelial Carcinoma; Inactivating Mutations in TSC2 and PIK3R1
Source: PLoS One. 2011 Apr 14;6(4):e18583. doi: 10.1371/journal.pone.0018583 (PMC3077383; doi:10.1371/journal.pone.0018583)
Supplement: Table S3 — Mutation details. (XLS) [file pone.0018583.s004.xls]

## Sheet: Sheet1
Table S3. Mutation details.
Sample ID	Gene	Codon	Nucleotide change	Consequencea	Comment	PolyPhen 2b	HumDiv Scoreb
UC_0001_1	FGFR3	375	tat > tgt	Y375C
UC_0002_1	FGFR3	249	tcc > tgc	S249C
UC_0005_1	FGFR3	249	tcc > tgc	S249C
UC_0006_2	FGFR3	375	tat > tgt	Y375C
UC_0009_2	FGFR3	249	tcc > tgc	S249C
UC_0011_3	FGFR3	249	tcc > tgc	S249C
UC_0012_1	FGFR3	375	tat > tgt	Y375C
UC_0021_1	FGFR3	373	agt > tgt	S373C
UC_0022_1	FGFR3	249	tcc > tgc	S249C
UC_0026_1	FGFR3	375	tat > tgt	Y375C
UC_0037_1	FGFR3	372	ggc > tgc	G372C
UC_0040_1	FGFR3	249	tcc > tgc	S249C
UC_0041_2	FGFR3	249	tcc > tgc	S249C
UC_0042_1	FGFR3	249	tcc > tgc	S249C
UC_0043_1	FGFR3	249	tcc > tgc	S249C
UC_0046_1	FGFR3	373	agt > tgt	S373C
UC_0047_1	FGFR3	249	tcc > tgc	S249C
UC_0051_1	FGFR3	375	tat > tgt	Y375C
UC_0052_1	FGFR3	249	tcc > tgc	S249C
UC_0056_1	FGFR3	372	ggc > tgc	G372C
UC_0061_1	FGFR3	249	tcc > tgc	S249C
UC_0067_1	FGFR3	375	tat > tgt	Y375C
UC_0070_1	FGFR3	249	tcc > tgc	S249C
UC_0076_1	FGFR3	375	tat > tgt	Y375C
UC_0078_1	FGFR3	249	tcc > tgc	S249C
UC_0080_1	FGFR3	249	tcc > tgc	S249C
UC_0096_1	FGFR3	249	tcc > tgc	S249C
UC_0100_1	FGFR3	249	tcc > tgc	S249C
UC_0106_1	FGFR3	249	tcc > tgc	S249C
UC_0111_1	FGFR3	249	tcc > tgc	S249C
UC_0114_1	FGFR3	249	tcc > tgc	S249C
UC_0115_1	FGFR3	249	tcc > tgc	S249C
UC_0117_1	FGFR3	249	tcc > tgc	S249C
UC_0129_1	FGFR3	249	tcc > tgc	S249C
UC_0130_1	FGFR3	249	tcc > tgc	S249C
UC_0137_1	FGFR3	249	tcc > tgc	S249C
UC_0145_1	FGFR3	375	tat > tgt	Y375C
UC_0147_1	FGFR3	249	tcc > tgc	S249C
UC_0159_1	FGFR3	249	tcc > tgc	S249C
UC_0161_1	FGFR3	382	ggg > agg	G382R
UC_0162_1	FGFR3	248	cgc > tgc	R248C
UC_0165_1	FGFR3	375	tat > tgt	Y375C
UC_0166_1	FGFR3	650	aag > gag	K650E
UC_0168_1	FGFR3	249	tcc > tgc	S249C
UC_0172_1	FGFR3	249	tcc > tgc	S249C
UC_0173_1	FGFR3	249	tcc > tgc	S249C
UC_0176_2	FGFR3	249	tcc > tgc	S249C
UC_0184_1	FGFR3	249	tcc > tgc	S249C
UC_0193_1	FGFR3	249	tcc > tgc	S249C
UC_0201_1	FGFR3	249	tcc > tgc	S249C
UC_0208_1	FGFR3	249	tcc > tgc	S249C
UC_0215_1	FGFR3	249	tcc > tgc	S249C
UC_0230_1	FGFR3	375	tat > tgt	Y375C
UC_0235_1	FGFR3	249	tcc > tgc	S249C
UC_0240_1	FGFR3	249	tcc > tgc	S249C
UC_0241_1	FGFR3	249	tcc > tgc	S249C
UC_0249_1	FGFR3	249	tcc > tgc	S249C
UC_0263_1	FGFR3	248	cgc > tgc	R248C
UC_0265_1	FGFR3	650	aag > gag	K650E
UC_0274_1	FGFR3	249	tcc > tgc	S249C
UC_0279_1	FGFR3	249	tcc > tgc	S249C
UC_0284_1	FGFR3	249	tcc > tgc	S249C
UC_0288_1	FGFR3	249	tcc > tgc	S249C
UC_0301_1	FGFR3	373	agt > tgt	S373C
UC_0312_1	FGFR3	248	cgc > tgc	R248C
UC_0321_1	FGFR3	249	tcc > tgc	S249C
UC_0323_1	FGFR3	249	tcc > tgc	S249C
UC_0327_1	FGFR3	375	tat > tgt	Y375C
UC_0343_1	FGFR3	249	tcc > tgc	S249C
UC_0344_1	FGFR3	372	ggc > tgc	G372C
UC_0349_2	FGFR3	248	cgc > tgc	R248C
UC_0359_1	FGFR3	249	tcc > tgc	S249C
UC_0361_1	FGFR3	650	aag > atg	K650M
UC_0367_1	FGFR3	249	tcc > tgc	S249C
UC_0368_1	FGFR3	249	tcc > tgc	S249C
UC_0374_2a	FGFR3	248	cgc > tgc	R248C
UC_0386_1	FGFR3	249	tcc > tgc	S249C
UC_0513_1a	FGFR3	650	aag > gag	K650E
UC_0519_1	FGFR3	375	tat > tgt	Y375C
UC_0542_1	FGFR3	249	tcc > tgc	S249C
UC_0544_1	FGFR3	375	tat > tgt	Y375C
UC_0545_1	FGFR3	375	tat > tgt	Y375C
UC_0001_1	PIK3CA	1047	cat > cgt	H1047R
UC_0008_1	PIK3CA	545	gag > aag	E545K
UC_0039_1	PIK3CA	545	gag > aag	E545K
UC_0040_1	PIK3CA	1047	cat > cgt	H1047R
UC_0041_2	PIK3CA	545	gag > aag	E545K
UC_0067_1	PIK3CA	545	gag > aag	E545K
UC_0078_1	PIK3CA	545	gag > aag	E545K
UC_0097_1	PIK3CA	542	gaa > aaa	E542K
UC_0106_1	PIK3CA	1047	cat > cgt	H1047R
UC_0114_1	PIK3CA	545	gag > aag	E545K
UC_0140_1	PIK3CA	545	gag > aag	E545K
UC_0145_1	PIK3CA	1047	cat > ctt	H1047L
UC_0161_1	PIK3CA	545	gag > aag	E545K
UC_0173_1	PIK3CA	1047	cat > ctt	H1047L
UC_0185_1	PIK3CA	545	gag > aag	E545K
UC_0192_1	PIK3CA	542	gaa > aaa	E542K
UC_0199_3	PIK3CA	542	gaa > aaa	E542K
UC_0209_1	PIK3CA	545	gag > aag	E545K
UC_0214_1	PIK3CA	542	gaa > aaa	E542K
UC_0215_1	PIK3CA	545	gag > aag	E545K
UC_0240_1	PIK3CA	545	gag > aag	E545K
UC_0249_1	PIK3CA	1049	ggt > agt	G1049S
UC_0257_1	PIK3CA	542	gaa > aaa	E542K
UC_0277_1	PIK3CA	545	gag > aag	E545K
UC_0284_1	PIK3CA	545	gag > aag	E545K
UC_0290_1	PIK3CA	542	gaa > aaa	E542K
UC_0323_1	PIK3CA	1017	gat > cat	D1017H
UC_0323_1	PIK3CA	545	gag > ggg	E545G
UC_0327_1	PIK3CA	1047	cat > ctt	H1047L
UC_0354_2a	PIK3CA	542	gaa > aaa	E542K
UC_0354_2a	PIK3CA	545	gag > aag	E545K
UC_0367_1	PIK3CA	545	gag > aag	E545K
UC_0374_2a	PIK3CA	1047	cat > cgt	H1047R
UC_0386_1	PIK3CA	545	gag > aag	E545K
UC_0475_1	PIK3CA	542	gaa > aaa	E542K
UC_0519_1	PIK3CA	1047	cat > cgt	H1047R
UC_0542_1	PIK3CA	545	gag > aag	E545K
UC_0544_1	PIK3CA	545	gag > aag	E545K
UC_0545_1	PIK3CA	545	gag > aag	E545K
UC_0290_1	PIK3R1	574	aga > aca	R574T		Probably damaging	0.972
UC_0017_1	HRAS	61	cag > ctg	Q61L
UC_0115_1	HRAS	61	cag > ctg	Q61L
UC_0185_1	HRAS	61	cag > aag	Q61K
UC_0192_1	HRAS	12	ggc > gcc	G12A
UC_0200_1	HRAS	61	cag > aag	Q61K
UC_0242_1	HRAS	61	cag > gtc	Q61L
UC_0223_1	KRAS	12	ggt > gat	G12D
UC_0257_1	KRAS	12	ggt > agt	G12S
UC_0488_2	KRAS	12	ggt > gat	G12D
UC_0516_1	KRAS	12	ggt > gtt	G12V
UC_0037_1	AKT1	17	gag > aag	E17K
UC_0195_1	AKT1	17	gag > aag	E17K
UC_0005_1	TSC1	868, 874		NKHSDTT > KSTQIPQ	1 bp del codon 868 (c), 1 bp insertion codon 874 (a) 7AA frame shift 868-874
UC_0037_1	TSC1	185	tac > tgc	Y185C		Probably damaging	1
UC_0093_1	TSC1	484	aga > gga	R484G		Possibly damaging	0.222
UC_0096_1	TSC1	493	gag > aag	E493K		Benign	0.033
UC_0117_1	TSC1	517	cgg > tga	R517X	Double Substitution
UC_0120_1	TSC1			Splice site mutation	exon11 c-1 g>a (Splice Acceptor), Familial TSC mutation [1].
UC_0140_1	TSC1	183	agt > aat	S183N		Probably damaging	0.984
UC_0170_1	TSC1	692	cga > tga	R692X	Familial/sprodaic TSC mutation [2].
UC_0173_1	TSC1	403	tcg > ttg	S403L	Found in TSC. Pathogenicity unknown [2].	Possibly damaging	0.367
UC_0192_1	TSC1	1025	agc > ggc	S1025G		Benign	0
UC_0203_1	TSC1	478	gaa > taa	E478X
UC_0214_1	TSC1	203	ttg > tcg	L203S		Probably damaging	0.998
UC_0215_1	TSC1	609	gag > cag	E609Q		Probably damaging	0.994
UC_0231_1	TSC1	49	tac > taa	Y49X
UC_0288_1	TSC1	192	tat > tgt	Y192C		Probably damaging	1
UC_0301_1	TSC1	133-134		Frame shift	4 bp frame shift deletion (tctt)
UC_0321_1	TSC1	739	cag > tag	Q739X
UC_0010_1	TSC2	1805	gag > ggg	E1805G		Probably damaging	0.984
UC_0006_2	TSC2	1773	cat > xat	Frame shift	1 bp frame shift deletion
UC_0195_1	TSC2	1186	tat > tgt	Y1186C		Probably damaging	0.995
UC_0003_1	TSC2	423	ctc > ttc	L423F		Possibly damaging	0.701
UC_0009_2	TSC2	1727	cat > aat	H1727N		Probably damaging	0.984
UC_0002_1	APC	1317	ctg > ctc	E1317Q	germline variant associated with colorectal carcinoma [3].	Benign	0.002
UC_0015_1	APC	1009	cat > tat	H1009Y		Possibly damaging	0.7
UC_0023_1	APC	903	gac > ggc	D903G		Possibly damaging	0.552
UC_0093_1	APC	1374	gaa > aaa	E1374K	Found in one case of pancreatic carcinoma [4].	Probably damaging	0.975
UC_0134_1	APC	1174	gat > aat	D1174N		Possibly damaging	0.708
UC_0207_1	APC	1645	gaa > caa	E1645K		Probably damaging	0.994
UC_0060_1	CTNNB1	32	gga > gta	D32Y		Probably damaging	0.999
UC_0226_1	CTNNB1	37	tct > ttt	S37F		Probably damaging	1
UC_0301_1	CTNNB1	37	tct > tgt	S37C		Probably damaging	1
UC_0001_1	TP53	156	cgc > xgc	Frame shift	1 bp frame shift deletion
UC_0003_1	TP53	113	ttc > ttg	F113L
UC_0005_1	TP53	280	aga > aaa	R280K
UC_0008_1	TP53	285	gag > aag	E285K
UC_0016_1	TP53	248	cgg > tgg	R248W
UC_0022_1	TP53	242	tgc > tac	C242Y
UC_0029_1	TP53	158	cgc > tgt	R158C	Double Substitution
UC_0034_1	TP53	220	tat > tgt	Y220C
UC_0042_1	TP53	285	gag > aag	E285K
UC_0043_1	TP53	279	ggg > gtg	G279V
UC_0049_2	TP53	118	aca > xca	Frame shift	1 bp frame shift deletion
UC_0053_1	TP53	258	gaa > aaa	E258K
UC_0057_1	TP53	248	cgg > cag	R248Q
UC_0059_1	TP53	240	agt > ggt	S240G
UC_0060_1	TP53	290	cgc > cac	R290H
UC_0069_1	TP53	248	cgg > cag	R248Q
UC_0077_1	TP53	248	cgg > cag	R248Q
UC_0080_1	TP53	273	cgt > cat	R273H
UC_0086_1	TP53	336	gag > tag	E336X
UC_0093_1	TP53	241	tcc > ttc	S241F
UC_0109_1	TP53	159	gcc >xxc	Frame shift	2 bp frame shift deletion (gc)
UC_0120_1	TP53	176	tgc > tac	C176Y
UC_0129_1	TP53	213	cga > tga	R213X
UC_0135_1	TP53	145	ctg > ccg	L145P
UC_0138_1	TP53	183	tca > tga	S183X
UC_0152_1	TP53	245	ggc > gac	G245D
UC_0154_2	TP53	273	cgt > ctt	R273L
UC_0166_1	TP53	248	cgg > tgg	R248W
UC_0187_1	TP53	279	ggg > gag	G279E
UC_0193_1	TP53	273	cgt > tgt	R273C
UC_0199_3	TP53	280	aga > aca	R280T
UC_0203_1	TP53	180	g[INS]ag	YGRCPHQ	18bp in-frame insertion atgggcgctgcccccacc
UC_0207_1	TP53	205	tat > tgt	Y205C
UC_0214_1	TP53	246	atg > att	M246I
UC_0215_1	TP53	175	cgc > cac	R175H
UC_0218_2	TP53	110	cgt > ctt	R110L
UC_0224_1	TP53	273	cgt > cat	R273H
UC_0230_1	TP53	205	tat > tgt	Y205C
UC_0242_1	TP53	273	cgt > cat	R273H
UC_0247_1	TP53	241	tcc > ttc	S241F
UC_0265_1	TP53	193	cat > cgt	H193R
UC_0265_1	TP53	350-353		Frame shift	10 bp frame shift deletion (tcaaggatgcc)
UC_0287_1	TP53	115-121		Frame shift	20 bp frame shift deletion (cattctgggacagccaagtc)
UC_0290_1	TP53	258	gaa > caa	E258Q
UC_0301_1	TP53	280	aga > aaa	R280K
UC_0302_1	TP53	273	cgt > ctt	R273L
UC_0312_1	TP53	127	tcc > tac	S127Y
UC_0321_1	TP53	135	tcg > tga	C135X
UC_0322_2	TP53	280	aga > aca	R280T
UC_0329_1	TP53	273	cgt > cat	R273H
UC_0335_1	TP53	58	cca > cxa	Frame shift	1 bp frame shift deletion
UC_0335_1	TP53	342	cga > tga	R342X
UC_0339_1	TP53	280	aga > aca	R280T
UC_0342_1	TP53	282	cgg > tgg	R282W
UC_0344_1	TP53	267	cgg > cxg	Frame shift	1 bp frame shift deletion
UC_0345_1	TP53	285	gag > aag	E285K
UC_0368_1	TP53	285	gag > aag	E285K
UC_0376_1	TP53	132	aag > aac	K132N
UC_0384_1	TP53	271	gag > aag	E271K
UC_0399_1	TP53	280	aga > aca	R280T
UC_0410_1b	TP53	294	gag > tag	E294X
UC_0410_1b	TP53	331	cag > tag	Q331X
UC_0458_1	TP53	298	gag > tag	E298X
UC_0488_2	TP53	125	acg[INS]	Frame shift	4 bp frameshift ins. (cacg) (homozygous) directly after codon 125 (last codon of exon 4)
UC_0516_1	TP53	280	aga > aca	R280T
UC_0518_1	TP53	280	aga > aca	R280T
UC_0522_1	TP53	285	gag > aag	E285K
UC_0533_1	TP53	241	tcc > ttc	S241F
UC_0539_1	TP53	276	cgg > ccg	R276P
UC_0543_1	TP53	285	gag > aag	E285K
UC_0544_1	TP53	283	gcg > gtg	R283C
UC_0545_1	TP53	113	ttc > ttg	F113L
UC_0551_1	TP53	192	cag > tag	Q192X
UC_0566_1	TP53	164-219		Deletion	249 bp del. from and including codon 164 (exon 5), to and including codon 219 (exon 6)
UC_0567_1	TP53	144	agc > xxx	Deletion	in-frame deletion
UC_0589_1	TP53	258	gaa > aaa	E258K
a FS indicates frameshift in the resulting amino acid sequence. X indicates nucleotide positions affected by deletions. [INS] indicates position of insertion.
b The PolyPhen 2 tool was used to predict the effect of amino acid substitution on protein function [5]
1. Niida Y, Lawrence-Smith N, Banwell A, Hammer E, Lewis J, Beauchamp RL, Sims K, Ramesh V, Ozelius L. Analysis of both TSC1 and TSC2 for germline mutations in 126 unrelated patients with tuberous sclerosis. Hum Mutat. 1999;14(5):412-22.
2. van Slegtenhorst M, Verhoef S, Tempelaars A, Bakker L, Wang Q, Wessels M, Bakker R, Nellist M, Lindhout D, Halley D, van den Ouweland A. Mutational spectrum of the TSC1 gene in a cohort of 225 tuberous sclerosis complex patients: no evidence for genotype-phenotype correlation. J Med Genet. 1999 Apr;36(4):285-9.
3. Frayling IM, Beck NE, Ilyas M, Dove-Edwin I, Goodman P, Pack K, Bell JA, Williams CB, Hodgson SV, Thomas HJ, Talbot IC, Bodmer WF, Tomlinson IP. The APC variants I1307K and E1317Q are associated with colorectal tumors, but not always with a family history. Proc Natl Acad Sci U S A. 1998 Sep 1;95(18):10722-7.
4. Imai y, Oda H, Tsurutani N, Nakatsuru Y, Inoue T, Ishikawa T. Frequent somatic mutations of the APC and p53 genes in sporadic ampullary carcinomas. Jpn J Cancer Res. 1997;88;846-54.
5. Adzhubei IA, Schmidt S, Peshkin L, Ramensky VE, Gerasimova A, Bork P, Kondrashov AS, Sunyaev SR. A method and server for predicting damaging missense mutations. Nat Methods. 2010 Apr;7(4):248-9.
